# Supplementary material for: The NCBI Comparative Genome Viewer (CGV) is an interactive visualization tool for the analysis of whole-genome eukaryotic alignments
Source: PubMed Central journal article supplement (PMC11101090; doi:10.1371/journal.pbio.3002405), 2024-05-07
Supplement: pbio.3002405.s001.pdf [file pbio.3002405.s001.pdf]

**A***Arabidopsis suecica* ASM1920280v1 (GCA\_019202805.1)

Default view (best placed alignments only)

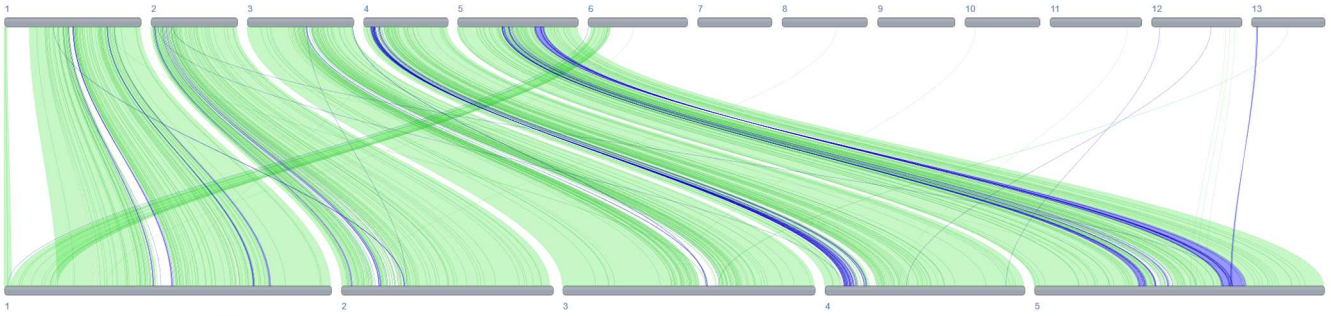*Arabidopsis thaliana* TAIR10.1 (GCF\_000001735.4)*Arabidopsis suecica* ASM1920280v1 (GCA\_019202805.1)

Including non-best placed alignments

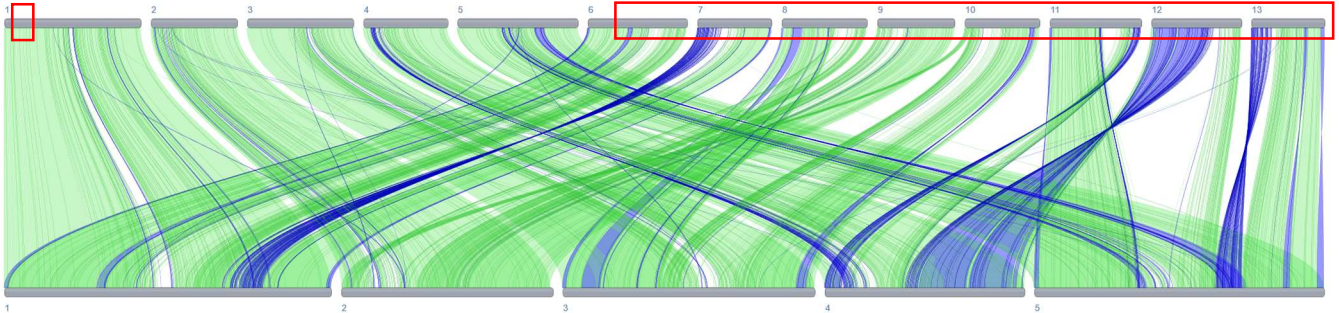*Arabidopsis thaliana* TAIR10.1 (GCF\_000001735.4)**B***Pan troglodytes* NHGRI\_mPanTro3-v1.1-hic.freeze\_pri (GCF\_028858775.1)

Default view (best placed alignments only)

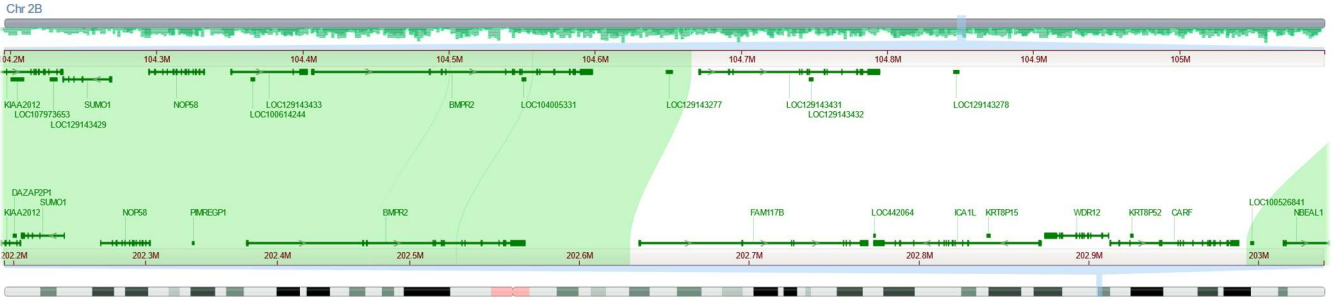*Homo sapiens* GRCh38.p14 (GCF\_000001405.40)*Pan troglodytes* NHGRI\_mPanTro3-v1.1-hic.freeze\_pri (GCF\_028858775.1)

Including non-best placed alignments

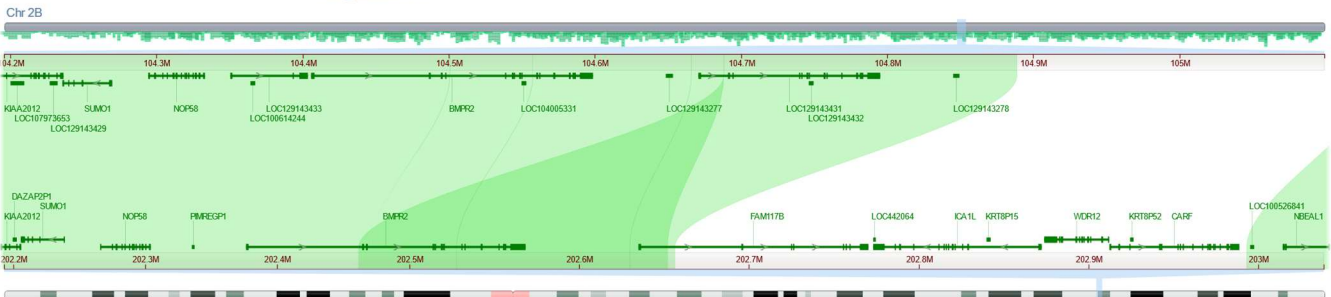*Homo sapiens* GRCh38.p14 (GCF\_000001405.40)

C

*Pan troglodytes* NHGRI\_mPanTro3-v1.1-hic.freeze\_pri (GCF\_028858775.1)

Default view (best placed alignments only)

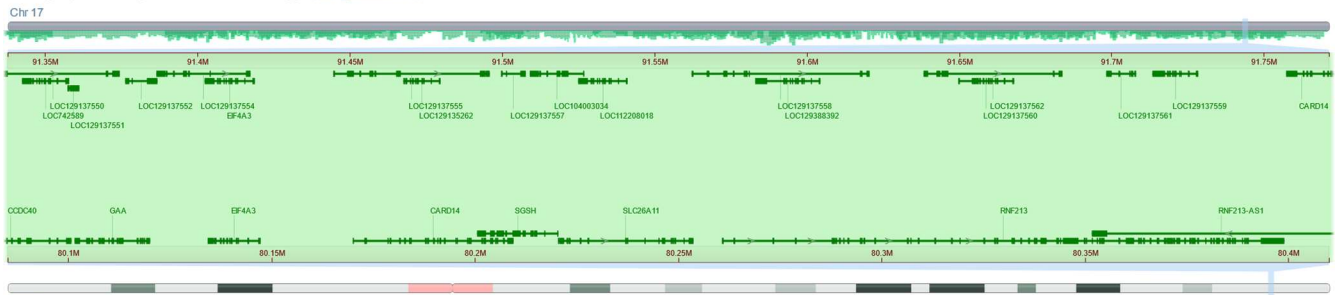

Including non-best placed alignments

*Pan troglodytes* NHGRI\_mPanTro3-v1.1-hic.freeze\_pri (GCF\_028858775.1)

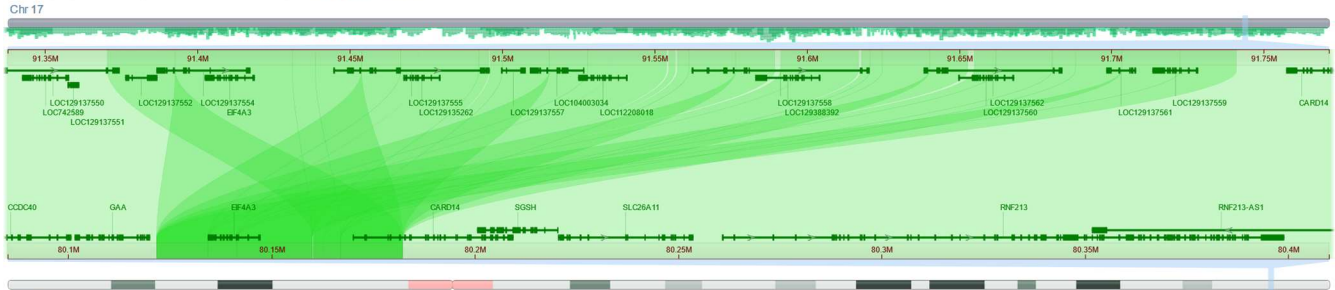

D

*Pan paniscus* NHGRI\_mPanPan1-v1.1-0.1.freeze\_pri (GCF\_029289425.1)

Default view (best placed alignments only)

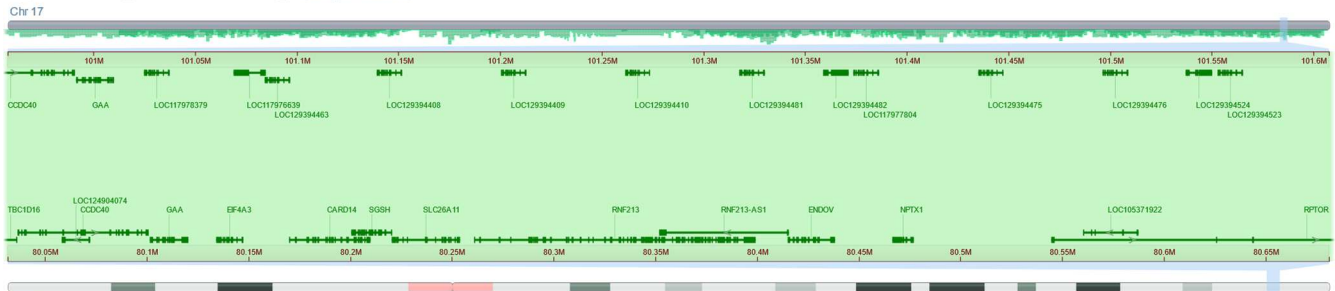

Including non-best placed alignments

*Pan paniscus* NHGRI\_mPanPan1-v1.1-0.1.freeze\_pri (GCF\_029289425.1)

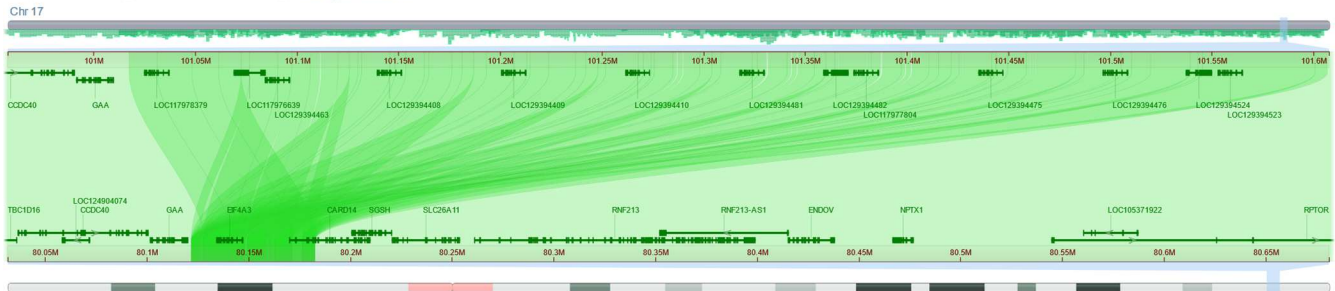

E

*Pan troglodytes* NHGRI\_mPanTro3-v1.1-hic.freeze\_pri (GCF\_028858775.1)

Default view (best placed alignments only)

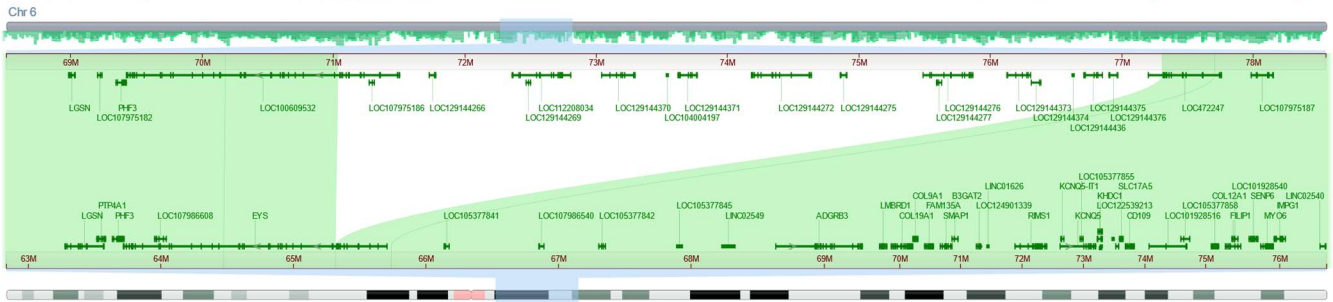

*Homo sapiens* GRCh38.p14 (GCF\_000001405.4)

*Pan troglodytes* NHGRI\_mPanTro3-v1.1-hic.freeze\_pri (GCF\_028858775.1)

Including non-best placed alignments

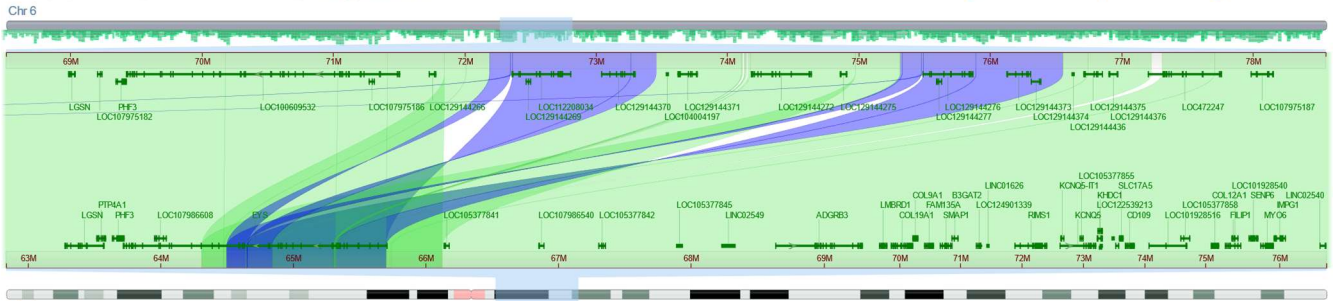

*Homo sapiens* GRCh38.p14 (GCF\_000001405.4)
